# Supplementary material for: Statistical detection and modeling of the over-dispersion of winter storm occurrence
Source: Copernicus journal article supplement (doi:10.5194/nhess-15-1757-2015), 2015-08-11
Supplement: Supplementary file 1 [file nhess-15-1757-2015-supplement.pdf]

Supplement of Nat. Hazards Earth Syst. Sci., 15, 1757–1761, 2015  
<http://www.nat-hazards-earth-syst-sci.net/15/1757/2015/>  
doi:10.5194/nhess-15-1757-2015-supplement  
© Author(s) 2015. CC Attribution 3.0 License.

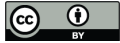

Natural Hazards  
and Earth System  
Sciences

Open Access

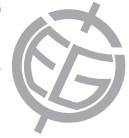

*Supplement of*

## **Statistical detection and modeling of the over-dispersion of winter storm occurrence**

**M. Raschke**

*Correspondence to:* M. Raschke (mathiasraschke@t-online.de)

The copyright of individual parts of the supplement might differ from the CC-BY 3.0 licence.

2

3

4

5

## 6 a. Thinning and over-dispersion

7 The survival probability that a storm event of a sample with given return period  $CRP_{old}$  is  
8 also member of the sample with  $CRP_{new}$ , being  $CRP_{old} > CRP_{new}$ , is  $P_{survival} = CRP_{old} / CRP_{new}$ .  
9 Following to Ross (2007, Example 3.16 and 3.18), the expectation and variance of the new  
10 count variable  $X_{new}$  is

$$11 \quad E(X_{new}) = E\left(\sum_{i=1}^{X_{old}} I_{new,i}\right) = E(X_{old})E(I_{new}) \text{ and} \quad (A1)$$

$$12 \quad V(X_{new}) = V\left(\sum_{i=1}^{X_{old}} I_{new,i}\right) = E(X_{old})V(I_{new}) + V(X_{old})E(I_{new})^2. \quad (A2)$$

13 The binary random variable  $I_{new,i}$  describes whether the storm event  $i$  is member of the new  
14 return level with  $I_{new,i}=1$  or if it is thinned out with  $I_{new,i}=0$ . We can also declare  $I_{old}$  for the  
15 old sample, but there is only one kind of realization with  $I_{old}=1$  being considered here. Figure  
16 A1 illustrates the thinning out.

17 The random variable  $I_{new}$  is Bernoulli distributed with expectation  $E(I)$  and variance  $V(I)$

$$18 \quad E(I) = P_{survival} \text{ and} \quad (A3)$$

$$19 \quad V(I) = P_{survival}(1 - P_{survival}). \quad (A4)$$

20 Now I introduce the relation

$$21 \quad V(X_{old}) = E(X_{old}) + \beta E(X_{old})^2 \quad (A5)$$

22 Where the over-dispersion parameter  $\beta > 0$ , which is determined by variance and expectation  
23 of count variable  $X_{old}$ . Eq. (A2) is modified for the new count variable with Eq. (A3,A4) to

$$24 \quad V(X_{new}) = E(X_{old})P_{survival}(1 - P_{survival}) + E(X_{old})P_{survival}^2. \quad (A6)$$

1 This equation can be simplified as follows:

$$2 \quad V(X_{new}) = E(X_{old})P_{survival} + \beta E(X_{old})^2 P_{survival}^2, \quad (A7)$$

3 wherein  $E(X_{old})P_{survival}$  is replaced by  $E(X_{new})$  according to Eq.(1,3) and we get

$$4 \quad V(X_{new}) = E(X_{new}) + \beta E(X_{new})^2. \quad (A8)$$

5 The resulting Eq.(A8) is basically equal to Eq.(A5). Therefore, Eq. (A5) is universal and  
 6 applies to  $X_{old}$  and  $X_{new}$ . This is not a totally new inference, as it was already derived for other  
 7 purposes (e.g., Mack 2002). I want to stress the fact that these results apply if the storm events  
 8 are independent from each other and occur in time according to an inhomogeneous Poisson  
 9 process. Eq.(A5,A8) can be proven by simple Monte Carlo simulations (not shown).

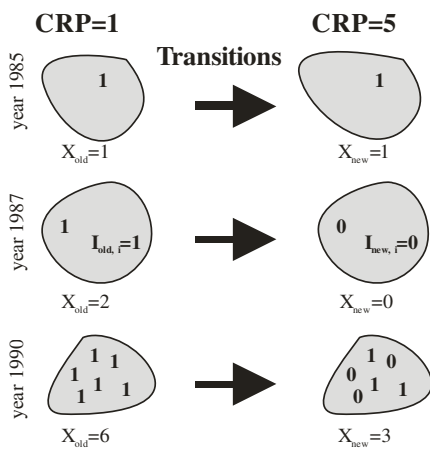

10

11 Figure A1: Transition of the count variable  $X$  of number of storms per season and the  
 12 corresponding binary variable  $I$ . The examples are for observations of the DWD samples  
 13 (Karremann 2014, Fig. 3).

14 **b. The storm samples**

15 Table B1: Analysed samples; the data DWD, NCEP and ERAI of historic storms are from  
 16 Karremann et al. (2014; Fig. 2 and supplementary Tab. B1)

| Sample type                           |   | DWD |    |    | NCEP |    |    | ERAI |    |    | GMC corr |      |      |
|---------------------------------------|---|-----|----|----|------|----|----|------|----|----|----------|------|------|
| Considered return period (CRP) [a]    |   | 1   | 2  | 5  | 1    | 2  | 5  | 1    | 2  | 5  | 1        | 2    | 5    |
| Number $X$ of storm events per season | 0 | 14  | 21 | 26 | 12   | 19 | 26 | 12   | 18 | 25 | 1734     | 2593 | 3378 |
|                                       | 1 | 8   | 6  | 3  | 9    | 8  | 3  | 10   | 10 | 4  | 1258     | 1065 | 621  |
|                                       | 2 | 6   | 2  | 0  | 7    | 2  | 0  | 6    | 1  | 1  | 666      | 341  | 84   |
|                                       | 3 | 0   | 0  | 1  | 1    | 1  | 1  | 0    | 1  | 0  | 286      | 78   | 8    |
|                                       | 4 | 1   | 0  | 0  | 1    | 0  | 0  | 2    | 0  | 0  | 108      | 10   | 0    |
|                                       | 5 | 0   | 1  | 0  | 0    | 0  | 0  | 0    | 0  | 0  | 30       | 5    | 1    |
|                                       | 6 | 1   | 0  | 0  | 0    | 0  | 0  | 0    | 0  | 0  | 8        | 0    | 0    |
| 7                                     | 0 | 0   | 0  | 0  | 0    | 0  | 0  | 0    | 0  | 2  | 0        | 0    |      |

17 References see brief communication.
